# Supplementary material
Source: Springer Nature journal article supplement (https://www.springermedizin.de/resource/supplementary/12948_2011_105_MOESM11_ESM.pdf/9556954)
Supplement: MOESM11 [file 9556954]

**A**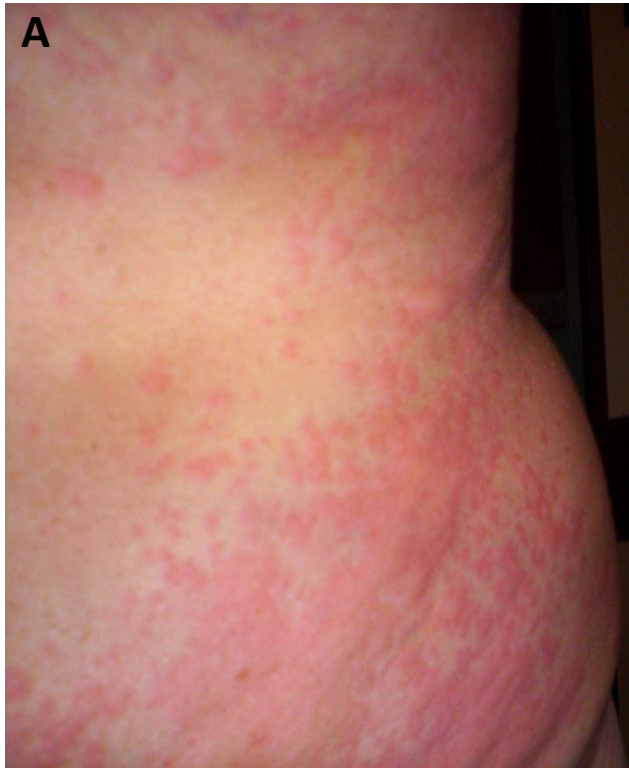**Figure 6B: Summary of laboratory data in the reported patient**

| Allergen/year     | 2008              |            | 2010                                              |            |
|-------------------|-------------------|------------|---------------------------------------------------|------------|
|                   | IgE levels (kU/L) | Class*     | IgE levels (kU/L)                                 | Class*     |
| <b>Beef**</b>     | <b>&gt; 0.09</b>  | <b>I</b>   | <b>&lt; 0.05</b>                                  | <b>0</b>   |
| <b>Pork</b>       | <b>&gt; 0.05</b>  | <b>0/I</b> | <b>&gt; 0.1</b>                                   | <b>I</b>   |
| <b>Lamb**</b>     |                   |            | <b>3.24 IU/mL (negative &lt;0.35)<sup>f</sup></b> |            |
| <b>Soybean</b>    | <b>&gt; 0.32</b>  | <b>II</b>  | <b>&gt; 1.09</b>                                  | <b>III</b> |
| <b>Wheat</b>      | <b>&gt; 0.22</b>  | <b>II</b>  | <b>&gt; 1.14</b>                                  | <b>III</b> |
| <b>Peanut</b>     | <b>&gt; 0.33</b>  | <b>II</b>  | <b>&gt; 3.07</b>                                  | <b>IV</b>  |
| <b>Alpha-gal†</b> |                   |            | <b>33.00 IU/mL (negative &lt;0.35)</b>            |            |

\* Reference range: Class 0 (< 0.05 kU/L); Class 0/I (0.05-0.07 kU/L); Class I (0.08-0.15 kU/L); Class II (0.16-0.50 kU/L); Class III (0.51-2.50 kU/L); Class IV (2.51-12.50 kU/L); Class V (12.51-62.50 kU/L); Class VI (62.51->100.00 kU/L)

<sup>f</sup> Repeated test done at Mayo clinic labs on the same collection date.
